# Supplementary material for: A Split-Luciferase Reporter Recognizing GFP and mCherry Tags to Facilitate Studies of Protein–Protein Interactions
Source: PubMed Central journal article supplement (PMC5751283; doi:10.3390/ijms18122681), 2017-12-11
Supplement: ijms-18-02681-s001.pdf [file ijms-18-02681-s001.pdf]

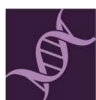

# 1 A split-luciferase reporter recognizing GFP and 2 mCherry tags to facilitate studies of protein-protein 3 interactions

4 Mehdi Moustaqil, Akshay Bhumkar, Laura Gonzalez, Lisa Raoul, Dominic J. B. Hunter, Pascal  
5 Carrive, Emma Sierecki and Yann Gambin

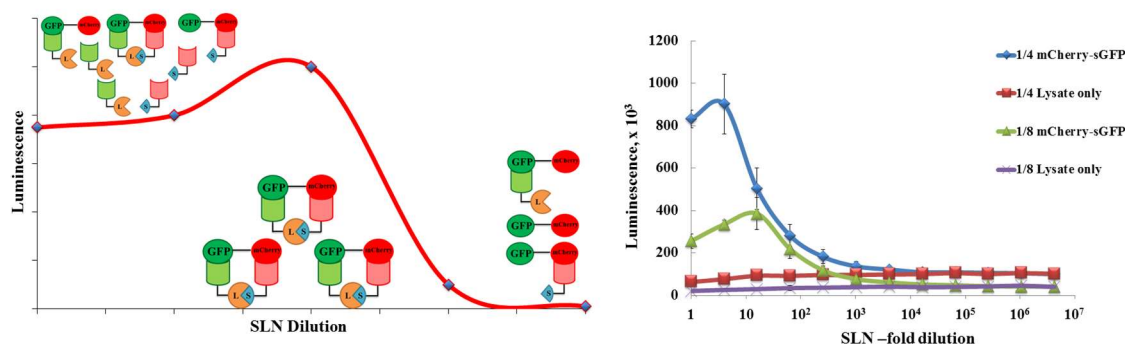

6  
7 Figure S1 (Supplementary info): **A** – Typical ‘hook’ effect explained when the SLN is serially diluted  
8 instead of the analyte. At highest concentration of the SLN, the signal stays higher than background  
9 but doesn’t reach maxima. Here, the SLNs are competing against each other for binding to their target  
10 where the two parts of split-Luc may end up on different protein targets. The signal reaches to  
11 maximum when the ratio between SLN and protein pair reaches 1:1 but drops down with further  
12 dilution due to lack of SLNs present for the reaction. **B** – Graphical representation of luminescence  
13 signal observed with serial dilution of SLN at a given concentration of analyte. Here, for each  
14 concentration analyte, we have corresponding concentration of non-expressing LTE that acts as  
15 background. It is evident that, at any given concentration of analyte, the signal is always higher than  
16 the background, confirming that we see limited split-Luc self-association and the complementation is  
17 driven by the presence of analyte.

18 Table S1: Protein sequences of the multiple protein used in construction of the universal split-Luc  
19 system.

| Name of the Gene                       | Sequence                                                                                                                                                                   |
|----------------------------------------|----------------------------------------------------------------------------------------------------------------------------------------------------------------------------|
| Anti – GFP                             | MQVQLVESGGALVQPGGSLRLSCAASGFPVNRYSMRWYRQAPGKERE<br>WVAGMSSAGDRSSYEDSVKGRFTISRDDARNTVYLQMNSLKPEDTAVYY<br>CNVNVGFEYWGQGTQVTVSS                                               |
| Anti – mCherry                         | MAQVQLVESGGGLVQAGGSLRLSCATSGFTFSYAMGWFRQAPGKERE<br>FVAAISWSGHVTDYADSVKGRFTISRDNVKNNTVYLQMNSLKPEDTAVYS<br>CAAASKGTWWYQRSENFSGSWGQGTQVTVSKEAI                                |
| Split-Luc Large bit                    | VFTLEDFVGDWEQTAAYNLDQVLEQGGVSSLLQNLAVSVTPIQIRIVRSG<br>ENALKIDIHVIIPEGLSADQMAQIEEVFKVVYPVDDHHFKVILPYGTLVI<br>DGVTPNMLNYFGRPYEGIAVFDGKKITVTGTLWNGNKIIDERLITPDGSM<br>LFRVTINS |
| Split-Luc Large bit<br>Flexible Linker | VTGYRLFEEIL<br>GSSGGGGSGGGGSSG                                                                                                                                             |
| Rigid Linker                           | EAAAKEAAK                                                                                                                                                                  |
| Flexible-Rigid linker                  | GSSGGGGSGGGGSSGEAAAKEAAKSSGGGGSGGGGSSGEAAAKEAA<br>AKGSSGGGGSGGGGSSG                                                                                                        |

20 Table S2: Accession numbers for the multiple proteins used as targets to test the universal split-Luc  
21 system

| <b>Name of Gene</b> | <b>Accession number</b> |
|---------------------|-------------------------|
| eGFP                | DQ389577.1              |
| sfGFP               | ASL68970                |
| mCherry             | AKH87425                |
| Foldon              | 4NCV_A                  |
| cMyc (b/HLH/Zip)    | P01106                  |
| HDAC3               | O15379                  |
| SOX9                | P48436                  |
| MyD88               | Q99836                  |
| Cav1                | Q03135                  |
| MaxZ (b/HLH/Zip)    | P61244                  |

22
